# Supplementary material for: Platinum nanoflowers supported on graphene oxide nanosheets: their green synthesis, growth mechanism, and advanced electrocatalytic properties for methanol oxidation
Source: Royal Society of Chemistry journal article supplement (doi:10.1039/c2jm31133j), 2012-01-01
Supplement: c2jm31133j.pdf [file c2jm31133j.pdf]

## Supporting information

# Platinum Nanoflowers Supported on Graphene Oxide Nanosheet: Its Green Synthesis, Growth Mechanism, and Advanced Electrocatalytic Property for Methanol Oxidation

*Xiaomei Chen, Bingyuan Su, Genghuang Wu, Chaoyong James Yang, Zhixia Zhuang,*

*Xiaoru Wang and Xi Chen\**

Department of Chemistry and Key Laboratory of Analytical Sciences of Xiamen University, College of Chemistry and Chemical Engineering, and State Key Laboratory of Marine Environmental Science, Xiamen University, Xiamen 361005, China.

Email: [xichen@xmu.edu.cn](mailto:xichen@xmu.edu.cn)

Tel: (86)-592-2184530, Fax: (86)-592-2184530.

## Supplementary Results

**Figure S1** TEM images of the aggregated PtNFs synthesized in the absence of GO at different magnifications.

**Figure S2** TEM images of the PtNFs-GO after reacting for 10 min.

**Figure S3** Electrocatalytic cycling stability of PtNFs-GO and Pt black in 0.5 M H<sub>2</sub>SO<sub>4</sub> solution containing 1 M methanol.

**Table S1** Comparison of methanol oxidation on PtNFs-GO hybrids with that on PtNPs-rGO hybrids.

Figure S1

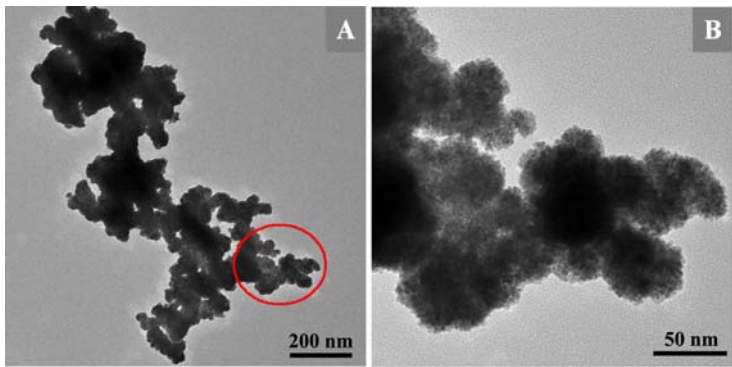

Figure S2

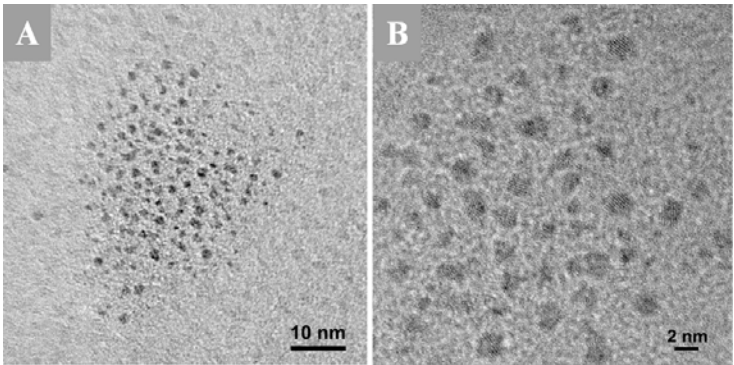

Figure S3

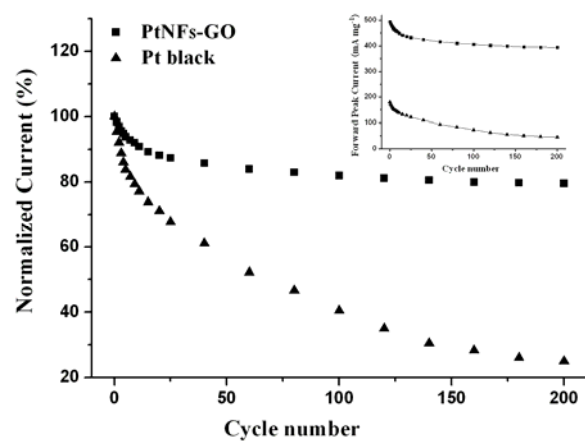

Table S1 Comparison of methanol oxidation on PtNFs-GO hybrids with that on PtNPs-rGO hybrids.

| Hybrids   | C <sub>methanol</sub><br>(mol/L) | C <sub>H2SO4</sub><br>(mol/L) | V <sub>p</sub><br>(V) | I <sub>f</sub>            | I <sub>f</sub> /I <sub>b</sub> | Ref.      |
|-----------|----------------------------------|-------------------------------|-----------------------|---------------------------|--------------------------------|-----------|
| PtNFs-GO  | 1.0                              | 0.5                           | 0.72                  | 523 mA/mg                 | 1.2                            | This work |
| PtNPs-rGO | 4.0                              | 1.0                           | 0.70                  | 105.7 mA/mg               | 2.73                           | 1         |
| PtNPs-rGO | 0.5                              | 0.5                           | 0.67                  | 4.2 mA /cm <sup>2</sup> . | 1.07                           | 2         |
| PtNPs-rGO | 1.0                              | 0.5                           | 0.70                  | 299 mA /mg                | 1.01                           | 3         |
| PtNPs-rGO | 2.0                              | 1.0                           | 0.68                  | 38.26 mA/mg               | 1.2                            | 4         |
| PtNPs-rGO | 1.0                              | 0.5                           | 0.7                   | 30.27 mA /cm <sup>2</sup> | 0.83                           | 5         |

## References

1. S. Sharma, A. Ganguly, P. Papakonstantinou, X.P. Miao, M.X. Li, J.L. Hutchison, M. Delichatsios and S. Ukleja, *J. Phys. Chem. C* 2010, **114**, 19459.
2. M.S. Wietecha, J. Zhu, G.H. Gao, N. Wang, H. Feng, M.L. Goring, M.L. Kasner and S.F. Hou, *J. Power Sources* 2012, **198**, 30.
3. Y.J. Li, W. Gao, L.J. Ci, C.M. Wang and P.M. Ajayan, *Carbon* 2010, **48**, 1124.
4. Z.M. Luo, L.H. Yuwen, B.Q. Bao, J. Tian, X.R. Zhu, L.X. Weng and L.H. Wang, *J. Mater. Chem.* DOI: 10.1039/c2jm30376k
5. P. Kundu, C. Nethravathi, P. A. Deshpande, M. Rajamathi, G. Madras and N. Ravishankar, *Chem. Mater.* 2011, **23**, 2772.
